# Supplementary material
Source: ML conference proceedings conference paper supplement (https://openreview.net/forum?id=BjZvLXvLZW)
Supplement: supplementary_material [file Michael_Johnson_Resume.pdf › mcpverse-main/mcpverse/test_data/mcp-document-reader/Michael_Johnson_Resume.pdf]

# Michael Johnson

Email: michael.johnson@email.com | Phone: (555) 123-4567

LinkedIn: linkedin.com/in/michaeljohnson | GitHub: github.com/mjohnson

## Education

### B.S. in Computer Science, The Ohio State University

*Aug 2019 - May 2023*

GPA: 3.8/4.0

## Experience

### Software Engineering Intern, Amazon Web Services (AWS)

*Jun 2022 - Aug 2022*

- Developed a scalable monitoring tool using Python and AWS Lambda to track cloud resource utilization.
- Collaborated with a team of 5 engineers to optimize data pipeline performance, reducing latency by 30%.
- Utilized AWS S3, EC2, and CloudWatch for storage, compute, and monitoring solutions.

## Projects

### Smart Scheduler App, Personal Project

*Jan 2023 - Apr 2023*

- Designed a mobile application using React Native and Firebase for automatic task scheduling.
- Implemented authentication and cloud functions to provide real-time updates.

## Skills

Python, Java, AWS, React, JavaScript, SQL, Git, Docker
