# Supplementary material
Source: ML conference proceedings conference paper supplement (https://openreview.net/forum?id=BjZvLXvLZW)
Supplement: supplementary_material [file Q326.pdf › mcpverse-main/mcpverse/test_data/code/Q326.pdf]

初步探索销售订单数据的结果如下：

## 1. 基本指标：

- 订单总数：984
- 客户总数：190
- 商品种类数：5

为了完成销售趋势预测和提出优化建议的任务，以下是具体的步骤和方法：

## 1. 时间序列预测模型

我们将使用ARIMA模型来预测未来一段时间的销售额。ARIMA（Auto-Regressive Integrated Moving Average）是一种常用的时间序列预测模型，适合处理具有趋势和季节性成分的销售数据。

### 步骤：

- **数据准备**：将销售数据按日期汇总，生成每日或每月的销售额时间序列。
- **模型训练**：使用ARIMA模型对历史销售数据进行拟合和训练。
- **未来预测**：基于训练好的模型预测未来一段时间的销售额。

## 2. 优化建议

结合之前的分析结果，我们可以从以下几个方面提出优化建议：

- **高绩效门店和商品**：根据门店和商品的表现，加大对高绩效门店和热门商品的资源投入，例如增加库存、加强营销推广。
- **低绩效商品的策略调整**：对于毛利率较低或销量较差的商品，考虑调整定价策略或加大促销力度，以提高其销售表现。
- **客户行为分析**：利用客户购买偏好数据，实施精准营销策略，针对不同客户群体推送个性化的促销信息，提升客户满意度和复购率。

接下来，我将使用ARIMA模型进行销售预测。

根据ARIMA模型的预测结果，未来30天的销售额趋于稳定，预测值逐渐接近一个固定值（约700,005元）。这表明模型认为当前的销售趋势较为平稳，没有明显的上升或下降趋势。

### 优化建议：

#### a. 库存和资源分配：

- 针对高绩效商品和门店，确保充足的库存和资源支持，避免因供应链问题导致的缺货现象。

#### b. 促销策略调整：

- 对于预测销售额较低的日子，可以考虑推出限时促销活动，吸引更多顾客，提升销售额。

#### c. 毛利率优化：

- 针对毛利率较低的商品，重新评估其定价策略，适当提高价格或通过降低成本来提升毛利率。

#### d. 客户行为分析：

- 利用客户购买偏好数据，实施个性化营销，针对不同客户群体推送定制化的促销信息，提高客户黏性和复购率。

通过这些优化措施，可以更好地应对未来的销售趋势，提升整体销售表现和盈利能力。

为了对采购订单数据进行初步探索并满足分析要求，以下是具体的步骤和方法：

## 1. 数据准备

首先，我们需要加载并检查采购订单数据的结构，确保数据的完整性和正确性。

## 2. 分析步骤

### 1) 统计基本指标

- 采购订单总数：**统计所有采购订单的数量。
- 供应商数量：**统计不同供应商的数量。
- 商品品类：**统计不同商品品类的数量。

### 2) 采购金额分布分析

- 最大值、最小值、平均值、中位数：**计算采购金额的这些统计量，以了解采购金额的分布情况。

### 3) 按商品属性和销售分类统计采购额占比

- 商品属性：**如“白18K金”、“PT950”等，统计各类商品的采购金额占比。
- 销售分类：**如“求婚钻戒”、“情侣戒”等，统计各类商品的采购金额占比。

### 4) 按供应商统计采购额分布

- 主要供应商识别：**统计各供应商的采购金额，识别出主要的供应商。

接下来，我将执行这些分析步骤。请上传采购订单数据文件，以便我进行详细的分析。

为了研究采购数据的时间变化规律，并识别采购高峰期和低谷期，以下是具体的分析步骤和方法：

## 1. 数据准备

首先，我们需要加载并检查采购数据的结构，确保数据的完整性和正确性。

## 2. 分析步骤

### 1) 按日期统计采购额

- **每日/每月采购额统计**：将采购数据按日期汇总，生成每日或每月的采购额时间序列，并绘制时间序列图，以观察采购额的时间变化趋势。

### 2) 周期性波动分析

- **节假日效应分析**：通过观察时间序列图，分析是否存在明显的周期性波动，如节假日前后的采购高峰或低谷。

### 3) 采购额最高的日期及特征分析

- **最高采购额日期**：找出采购额最高的日期，并分析该日期的采购特征，如主要采购的商品品类和供应商。

### 4) 采购与销售数据的对比分析

- **内在关系分析**：将采购数据与销售数据进行对比，分析两者之间的内在关系，如采购高峰是否对应销售高峰，是否存在滞后期等。

接下来，我将执行这些分析步骤。请上传采购订单数据文件，以便我进行详细的分析。

为了评估不同供应商的采购贡献并优化供应商管理，以下是具体的分析步骤和方法：

## 1. 数据准备

首先，我们需要加载并检查采购数据的结构，确保数据的完整性和正确性。

## 2. 分析步骤

### 1) 按供应商统计采购额排名

- **采购额排名**：统计每个供应商的总采购额，并进行排名，以识别出提供最多商品的供应商。
- **供应商贡献分析**：分析这些供应商的商品种类和数量，了解他们对整体采购的贡献。

## 2) 供应商与商品属性的关系分析

- 特定商品属性的供应商分析：探索是否有某些供应商更擅长提供特定商品属性，如“白18K金”或“PT950”。通过统计各供应商提供的不同商品属性的采购额，识别出在特定商品上有优势的供应商。

接下来，我将执行这些分析步骤。请上传采购订单数据文件，以便我进行详细的分析。

### 2. 销售金额的分布：

- 最大值：55726.05
- 最小值：345.8
- 平均值：6680.37
- 中位数：4388.05

### 3. 按商品属性统计的销售占比：

- 白18K金：63.95%
- PT950：34.65%
- 分色18K金：1.09%
- 红18K金：0.29%
- 其它：0.02%

### 4. 按销售渠道统计的销售分布：

- 线上：713898.40
- 线下：5859587.65

接下来可以进一步深入分析，如有需要可以继续探索。

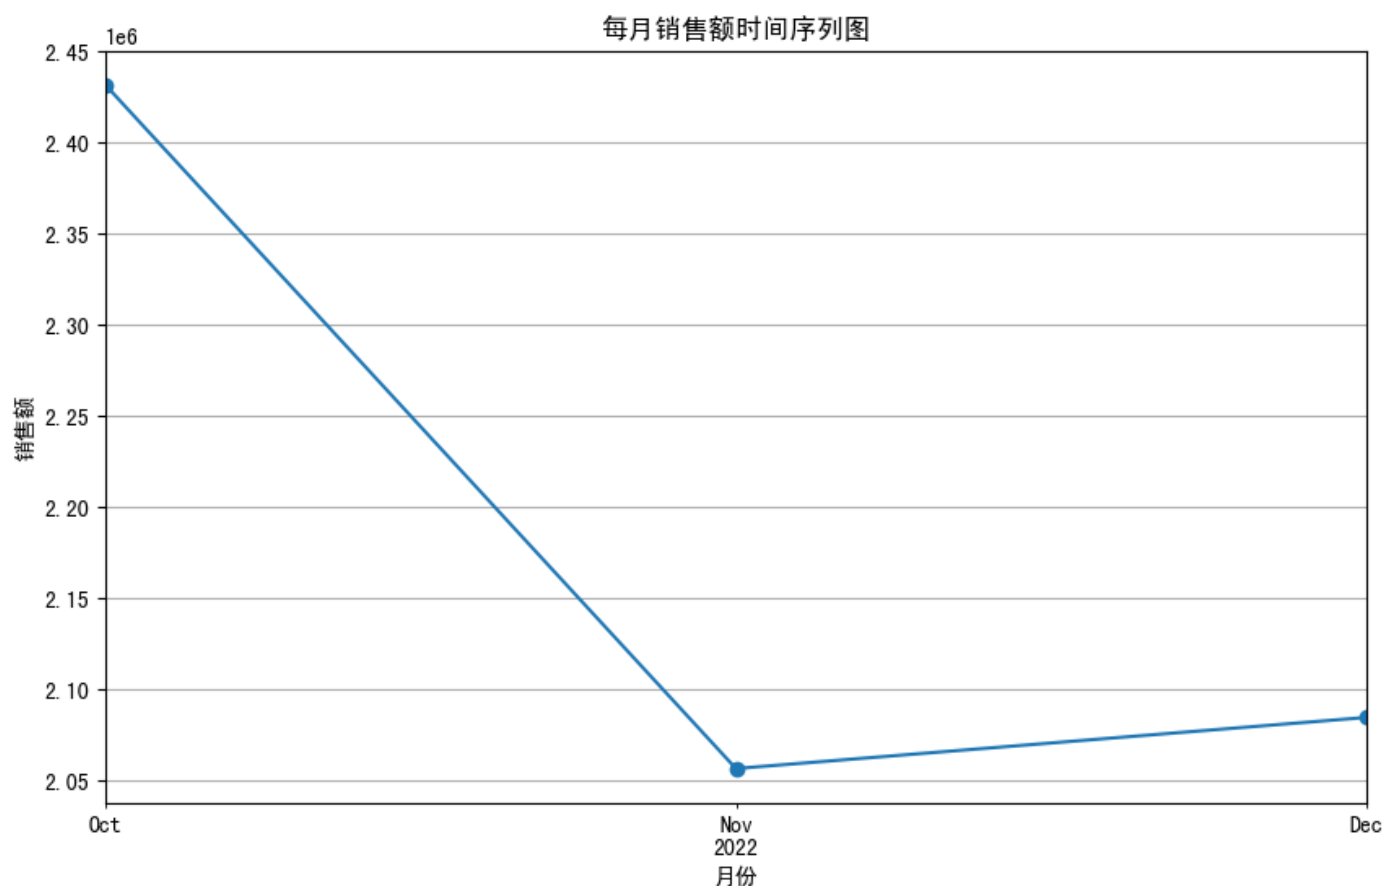

根据分析结果：

- 1. 销售额最高的日期是2022年10月2日，当天的总销售额为300,051.80元。
- 2. 销售特征：
  - 主要商品属性为“白18K金”和“PT950”。
  - 销售途径包括多个线下门店（如上海店、福州店、广州店等）以及线上渠道（如公司APP、淘宝店）。
  - 该日期的销售额主要集中在高单价商品，尤其是“PT950”和“白18K金”类产品。

接下来将进一步分析销售额的周期性波动和不同月份之间销售额变化的原因。

根据不同月份的销售额变化分析：

- 1. 订单数量：
  - 2022年10月：366单
  - 2022年11月：304单
  - 2022年12月：314单10月的订单数量明显高于11月和12月。

- 2. 平均订单金额：
  - 2022年10月：6644.02元
  - 2022年11月：6766.01元
  - 2022年12月：6639.84元各月的平均订单金额相对接近，说明销售额的变化主要受订单数量的影响。

洞察：

- 10月的销售额较高，主要由于订单数量较多，可能与促销活动或特定节假日有关。
- 11月和12月的销售额略有下降，订单数量减少是主要原因，平均订单金额变化不大。

接下来如果有更多数据，可以进一步分析节假日效应或其他外部因素对销售的影响。

根据分析结果：

- 1. 门店销售额排名：

为了评估不同商品的采购成本及其对整体采购的影响，以下是具体的分析步骤和方法：

## 1. 数据准备

首先，我们需要加载并检查采购数据的结构，确保数据的完整性和正确性。

## 2. 分析步骤

### 1) 按商品统计采购额和采购量排名

- **采购额和采购量排名**：统计每种商品的总采购额和采购量，并进行排名，以识别出采购最多商品。

### 2) 按销售分类统计采购额和采购量排名

- **销售分类采购分析**：统计每个销售分类的总采购额和采购量，并进行排名，以识别出采购最多的销售分类。

### 3) 计算单位采购成本

- **单位采购成本分析**：计算每种商品的单位采购成本（采购金额/采购数量），找出高成本和低成本的商品。

### 4) 采购策略和供应商选择调整

- **采购策略调整**：基于单位采购成本分析，探讨是否需要调整某些商品的采购策略或选择不同的供应商以降低成本。

### 5) 计算毛利率并识别高盈利商品

- **毛利率计算**：计算每种商品的毛利率（销售金额-采购成本）/销售金额，识别出盈利能力最高的商品。

接下来，我将执行这些分析步骤。请上传采购订单数据文件，以便我进行详细的分析。

为了评估采购数据与销售数据之间的匹配程度，并优化库存管理，以下是具体的分析步骤和方法：

## 1. 数据准备

首先，我们需要加载并检查采购数据和销售数据的结构，确保数据的完整性和正确性。

## 2. 分析步骤

### 1) 对比采购订单与销售订单中的商品

- **商品供需对比**：统计采购订单中的商品数量与销售订单中的商品需求量，分析两者之间的匹配程度。识别出是否存在某些商品的采购量远高于或低于销售需求的情况。

## 2) 分析供需不匹配的情况

- **供需不匹配分析：**对于存在明显供需不匹配的商品，进一步分析其原因。例如，是否因为预测不准确、采购周期过长、或者市场需求突然变化等原因导致的不匹配。

## 3) 库存管理策略探究

- **库存管理策略分析：**基于采购与销售数据的匹配分析结果，探究当前公司的库存管理策略。评估现有的库存水平是否合理，是否存在过多的积压库存或库存不足的情况。
- **优化建议：**根据分析结果，提出优化库存管理的建议。例如，调整采购频率、优化库存周转率、或者改进需求预测模型等。

接下来，我将执行这些分析步骤。请上传采购订单和销售订单数据文件，以便我进行详细的分析。

- 表现最好的门店是广州店1，销售额为453,481.55元。
- 其他高绩效门店包括公司APP、淘宝店、安徽店1和杭州店1。

### 2. 城市销售表现：

- 销售表现最好的城市是深圳店，总销售额为533,116.25元。
- 其他表现较好的城市包括广州店、上海店、安徽店和杭州店。

### 3. 区域商品偏好：

- 上海店和广州店更偏好销售“白18K金”商品。
- 北京的门店（如北京万象城店、北京王府井店）对“PT950”商品有较高的偏好。
- 淘宝店和深圳店的销售额中，“白18K金”占据了较大的比例。

这些结果可以帮助识别高绩效和低绩效的门店，并了解不同区域的消费者偏好。

根据分析结果：

### 1. 客户偏好分析：

- 客户最常购买的商品属性、手寸大小和销售渠道已经统计出来。例如，客户“丁\*\*”偏好购买“PT950”商品，手寸为9，主要通过线下渠道购买。

### 2. 线上与线下购买偏好：

- 大多数客户更倾向于线下购买。例如，客户“丁\*\*”进行了7次线下购买和1次线上购买，显示出对线下渠道的偏好。
- 我们可以通过计算线上和线下购买次数来识别客户群体的购买偏好，目前数据显示线下购买占主导地位。

接下来可以进一步分析不同客户群体的具体特征，帮助制定更精准的营销策略。

根据分析结果：

### 1. 商品销售额和销量排名：

- 销售额最高的商品编码为ZD32017A，销售额为683,601.0元，但其销量仅为2件，表明该商品单价较高。

## 2. 毛利率分析：

- 大部分商品的毛利率约为14.5%，例如商品编码S32077B和S37883B。这些商品的毛利率较低，可能需要重新评估其定价策略。

## 3. 定价策略和促销力度调整建议：

- 毛利率较低的商品（如S32077B、ZD11079A等）可能需要提高售价或降低成本，以提升盈利能力。
- 销量较低的商品（如ZD36582A、ZD50677A等）可能需要加大促销力度，吸引更多顾客购买。

通过这些分析，可以帮助优化商品管理和营销策略，提高整体销售表现和盈利能力。
