# Supplementary material
Source: ML conference proceedings conference paper supplement (https://openreview.net/forum?id=BjZvLXvLZW)
Supplement: supplementary_material [file Q353.pdf › mcpverse-main/mcpverse/test_data/code/Q353.pdf]

| <b>Index</b> | <b>Name</b>     | <b>Chinese</b> | <b>Mathematics</b> | <b>English</b> |
|--------------|-----------------|----------------|--------------------|----------------|
| 1            | Liu Xinmin      | 76             | 79                 | 80             |
| 2            | Hu Xuexia       | 85             | 98                 | 69             |
| 3            | Wang Lingxin    | 66             | 75                 | 97             |
| 4            | Liu Bingbing    | 79             | 92                 | 71             |
| 5            | Chen Wangwang   | 90             | 80                 | 88             |
| 6            | Xia Long        | 59             | 86                 | 69             |
| 7            | Hou Chongyang   | 85             | 96                 | 71             |
| 8            | Bao Chengang    | 80             | 94                 | 79             |
| 9            | Chen Qiangqiang | 96             | 73                 | 81             |
| 10           | Huang Pingping  | 96             | 91                 | 87             |
| 11           | Cui Chengqi     | 65             | 93                 | 80             |
| 12           | Chen Feifei     | 68             | 78                 | 93             |
| 13           | Hu Haoming      | 91             | 82                 | 70             |
| 14           | Huang Yiping    | 71             | 86                 | 85             |
| 15           | Li Muiyang      | 74             | 88                 | 28             |
| 16           | Chen Shengdong  | 86             | 92                 | 71             |
| 17           | Hu Wenwen       | 65             | 98                 | 96             |
