# Supplementary material
Source: ML conference proceedings conference paper supplement (https://openreview.net/forum?id=BjZvLXvLZW)
Supplement: supplementary_material [file Q354.pdf › mcpverse-main/mcpverse/test_data/code/Q354.pdf]

| <b>Month</b>  | <b>Brand</b>  | <b>Revenue</b> | <b>Cost</b> |
|---------------|---------------|----------------|-------------|
| January 2023  | East China    | 632234         | 400000      |
| February 2023 | East China    | 690773         | 450000      |
| March 2023    | East China    | 509627         | 350000      |
| April 2023    | East China    | 795365         | 500000      |
| May 2023      | East China    | 710532         | 480000      |
| June 2023     | East China    | 798284         | 520000      |
| January 2023  | Central China | 674824         | 420000      |
| February 2023 | Central China | 659616         | 430000      |
| March 2023    | Central China | 717223         | 460000      |
| April 2023    | Central China | 508579         | 320000      |
| May 2023      | Central China | 674875         | 440000      |
| June 2023     | Central China | 506167         | 330000      |
