# Supplementary material
Source: ML conference proceedings conference paper supplement (https://openreview.net/forum?id=BjZvLXvLZW)
Supplement: supplementary_material [file Q383.pdf › mcpverse-main/mcpverse/test_data/code/Q383.pdf]

Model % Resolved Org Date Logs Trajs Site

Isoform 55.00 <https://avatars.githubusercontent.com/u/4956703?s=200&v=4> 2025-01-14 ✓ ✓ 卜

Blackbox AI Agent 49.00 - 2024-12-20 ✓ ✓ 卜

Gru(2024-12-08) 48.67

[https://pbs.twimg.com/profile\\_images/1832709320896917504/FB5KojGT\\_400x400.png](https://pbs.twimg.com/profile_images/1832709320896917504/FB5KojGT_400x400.png) 2024-12-08 - - 卜

Globant Code Fixer Agent 48.33 <https://ai.globant.com/wp-content/uploads/2024/06/favicon.png> 2024-11-27 ✓ ✓ 卜

devlo 47.33 <https://devlo.ai/static/media/devlo.ef99a045eba5ea0bcada.png> 2024-11-22 ✓ ✓ 卜

Kodu-v1 + Claude-3.5 Sonnet (20241022) 44.67

<https://raw.githubusercontent.com/kodu-ai/claude-coder/main/extension/assets/kodu.png> 2024-12-07 ✓ ✓ 卜

OpenHands + CodeAct v2.1 (claude-3-5-sonnet-20241022) 41.67 - 2024-10-25 ✓ ✓ 卜

PatchKitty-0.9 + Claude-3.5 Sonnet (20241022) 41.33 - 2024-12-20 ✓ ✓ -

Composio SWE-Kit (2024-10-30) 41.00 - 2024-10-30 ✓ ✓ 卜

Agentless-1.5 + Claude-3.5 Sonnet (20241022) 40.67 - 2024-12-02 ✓ ✓ 卜

OpenCSG Starship Agentic Coder + GPT 4 (0806) 39.67 - 2025-01-13 ✓ ✓ 卜

Bytedance MarsCode Agent 39.33 - 2024-09-12 ✓ ✓ 卜

Moatless Tools + Claude 3.5 Sonnet (20241022) 39.00 - 2025-01-14 ✓ ✓ 卜

Moatless Tools + Claude 3.5 Sonnet (20241022) 38.33 - 2024-11-17 ✓ ✓ 卜

Honeycomb 38.33 - 2024-08-20 ✓ ✓ 卜

Patched.Codes Patchwork 37.00 - 2025-01-04 ✓ ✓ 卜

AppMap Navie v2 36.00 - 2024-11-13 ✓ ✓ 卜

CodeFuse-AAIS 35.67 - 2025-01-04 ✓ ✓ 卜

Gru(2024-08-11) 35.67 - 2024-08-11 ✓ ✓ 卜

Isoform 35.00 - 2024-08-29 ✓ ✓ 卜

SuperCoder2.0 34.00 - 2024-08-06 ✓ ✓ 卜

Bytedance MarsCode Agent + GPT 4o (2024-05-13) 34.00 - 2024-07-23 ✓ - 卜

Alibaba Lingma Agent 33.00 - 2024-06-22 ✓ ✓ 卜

Agentless-1.5 + GPT 4o (2024-05-13) 32.00 - 2024-10-28 - - 卜

CodeShellTester + GPT 4o (2024-05-13) 31.33 - 2024-11-11 ✓ ✓ 卜

AutoCodeRover (v20240620) + GPT 4o (2024-05-13) 30.67 - 2024-06-21 ✓ ✓ 卜

AIGCode Infant-Coder(2024-08-30) 30.00 - 2024-09-08 ✓ ✓ 卜

Kortix AI (claude-3-5-sonnet-20241022) 30.00 - 2024-12-03 ✓ ✓ 卜

Amazon Q Developer Agent (v20240719-dev) 29.67 - 2024-07-21 ✓ ✓ 卜

Agentless + RepoGraph + GPT-4o 29.67 - 2024-08-08 ✓ ✓ 卜

CodeR + GPT 4 (1106) 28.33 - 2024-06-04 ✓ ✓ 卜

reproducedRG 28.00 - 2024-11-17 ✓ ✓ -

SIMA + GPT 4o (2024-05-13) 27.67 - 2024-07-06 ✓ ✓ 卜

MASAI + GPT 4o (2024-05-13) 27.33 - 2024-06-12 ✓ ✓ 卜

Agentless + GPT 4o (2024-05-13) 27.33 - 2024-06-30 ✓ - 卜

Moatless Tools + Claude 3.5 Sonnet 26.67 - 2024-06-23 ✓ ✓ 卜

OpenHands + CodeAct v1.8 26.67 - 2024-07-25 ✓ ✓ 卜

IBM Research Agent-101 26.67 - 2024-06-12 ✓ - 卜

Aider + GPT 4o & Claude 3 Opus 26.33 - 2024-05-23 ✓ - 卜

HyperAgent 25.33 - 2024-09-25 ✓ ✓ 卜

Moatless Tools + GPT 4o (2024-05-13) 24.67 - 2024-06-17 ✓ ✓ 卜

IBM AI Agent SWE-1.0 (with open LLMs) 23.67 - 2024-10-16 ✓ ✓ 卜

SWE-Fixer (Qwen2.5-7b retriever + Qwen2.5-72b editor) 20241128 23.33 - 2024-11-28 ✓ ✓ 卜

SWE-agent + Claude 3.5 Sonnet 23.00 - 2024-06-20 ✓ ✓ 卜  
AppMap Navie + GPT 4o (2024-05-13) 21.67 - 2024-06-15 ✓ - 卜  
Bytedance AutoSE (based on SWE-Agent) + GPT4/GPT4o Mixed (20240828) 21.67 - 2024-08-28 ✓ ✓ -  
Amazon Q Developer Agent (v20240430-dev) 20.33 - 2024-05-09 ✓ - 卜  
AutoCodeRover (v20240408) + GPT 4 (0125) 19.00 - 2024-05-30 ✓ - 卜  
SWE-agent + GPT 4o (2024-05-13) 18.33 - 2024-07-28 ✓ ✓ 卜  
SWE-agent + GPT 4 (1106) 18.00 - 2024-04-02 ✓ ✓ 卜  
SWE-agent + Claude 3 Opus 11.67 - 2024-04-02 ✓ ✓ 卜  
RAG + Claude 3 Opus 4.33 - 2024-04-02 ✓ - 卜  
RAG + Claude 2 3.00 - 2023-10-10 ✓ ✓ -  
RAG + GPT 4 (1106) 2.67 - 2024-04-02 ✓ - -  
RAG + SWE-Llama 7B 1.33 - 2023-10-10 ✓ - -  
RAG + SWE-Llama 13B 1.00 - 2023-10-10 ✓ - -  
RAG + ChatGPT 3.5 0.33 - 2023-10-10 ✓ - -  
Moatless Tools + Deepseek V3 0.00 - 2025-01-11 ✓ ✓ 卜
