# Supplementary material
Source: ML conference proceedings conference paper supplement (https://openreview.net/forum?id=BjZvLXvLZW)
Supplement: supplementary_material [file Q387.pdf › mcpverse-main/mcpverse/test_data/code/Q387.pdf]

Kaito ran a tiny repair shop near the harbor, where salt crept into hinges and timepieces and every door had a soft chorus. Tourists bought new gadgets up the hill, but the locals brought him what they did not wish to throw away. One rainy morning, a girl arrived with a windup music box shaped like a lighthouse. It would play two notes, cough, and stop. Kaito opened the back and found a grain of sand wedged between two teeth of the wheel. He brushed it free, oiled the stem, and closed the case. When he turned the key, the song flowed like tidal water into the dim shop. The girl smiled, then frowned, and said the song was slower than she remembered. Kaito listened again and agreed. Age pulls on springs and on people, he said, but there is still tune in both. She asked how much the fix would cost. Pay me with a story, he said, and pointed to a ledger where customers had written lines about first days and last days. She wrote about waiting on the pier for her brother, a sailor who sent postcards with drawings of birds he could not name. When she finished, Kaito copied the tempo of her memory by adding a small felt pad under the governor. The song brightened, not fast, only honest. Before she left, he made tea and showed her a wall of parts sorted in jars, screws like seeds, gears like moons in a tidy sky. After the door closed, the rain lifted and boats began to sound their horns. Kaito wound the shop clock and set it to the harbor bell. He felt steady, as if each click were a step laid on wet stone, small, careful, and good. Outside, sunlight stitched puddles into mirrors.
