# Supplementary material
Source: ML conference proceedings conference paper supplement (https://openreview.net/forum?id=BjZvLXvLZW)
Supplement: supplementary_material [file test_hello.pdf › mcpverse-main/test/data_samples/test_hello.pdf]

**Hello World**
